CORRECTION

## Correction: cytoNet: Spatiotemporal network analysis of cell communities

Arun S. Mahadevan, Byron L. Long, Chenyue W. Hu, David T. Ryan, Nicolas E. Grandel, George L. Britton, Marisol Bustos, Maria A. Gonzalez Porras, Katerina Stojkova, Andrew Ligeralde, Hyeonwi Son, John Shannonhouse, Jacob T. Robinson, Aryeh Warmflash, Eric M. Brey, Yu Shin Kim, Amina A. Qutub

The following information is missing from the Funding statement: NIH 5T32DE014318 grant to JS.

### Reference

1. Mahadevan AS, Long BL, Hu CW, Ryan DT, Grandel NE, Britton GL, et al. cytoNet: Spatiotemporal network analysis of cell communities. PLoS Comput Biol. 2022;18(6):e1009846. <https://doi.org/10.1371/journal.pcbi.1009846> PMID: [35696439](https://pubmed.ncbi.nlm.nih.gov/35696439/)

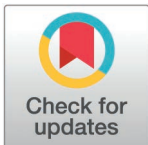

### OPEN ACCESS

**Citation:** Mahadevan AS, Long BL, Hu CW, Ryan DT, Grandel NE, Britton GL, et al. (2025) Correction: cytoNet: Spatiotemporal network analysis of cell communities. PLoS Comput Biol 21(6): e1013176. <https://doi.org/10.1371/journal.pcbi.1013176>

**Published:** June 10, 2025

**Copyright:** © 2025 Mahadevan et al. This is an open access article distributed under the terms of the [Creative Commons Attribution License](https://creativecommons.org/licenses/by/4.0/), which permits unrestricted use, distribution, and reproduction in any medium, provided the original author and source are credited.
